# Supplementary material
Source: publisher site journal article supplement (https://www.dovepress.com/get_supplementary_file.php?f=216745-S3.xlsx)
Supplement: Supplementary file 1 [file get_supplementary_file.php]

## Sheet: all_InDel_length.dis
Table.S3 InDels statistics for 10 A. baumannii isolates by whole-genome resequencing
	MDR-CQA	MDR-CQB	MDR-CQC	MDR-CQD	MDR-CQE	MDR-CQF	MDR-CQG	MDR-CQH	MDR-CQI	MDR-CQJ
Insertion	16	23	6	25	20	16	7	18	33	7
Deletion	15	24	10	24	24	15	11	19	35	10
CDS_InDel	3	3	2	3	7	3	3	7	8	3
Frame-shifted	2	2	1	2	4	2	2	4	5	2
Damaged-Start-Codon	0	0	0	0	0	0	0	0	0	0
Damaged-Stop-Codon	0	0	0	0	0	0	0	0	0	0
Premature-Stop	0	0	0	0	0	0	0	0	0	0
Others-Change	1	1	1	1	3	1	1	3	3	1
CDS_with_INDEL	3	3	2	3	7	3	3	7	8	3
